# Supplementary material
Source: ML conference proceedings conference paper supplement (https://openaccess.thecvf.com/content/CVPR2026/html/Gavrikov_VisualOverload_Probing_Visual_CVPR_2026_paper.html)
Supplement: Supplementary file 1 [file Gavrikov_VisualOverload_Probing_Visual_CVPR_2026_supplemental.pdf]

# VISUALOVERLOAD

## Probing Visual Understanding of VLMs in *Really* Dense Scenes

### Supplementary Material

#### Overview

|                                                          |   |
|----------------------------------------------------------|---|
| <a href="#">A Quantifying Image Complexity</a>           | 1 |
| <a href="#">B Discussion of Domain Shift</a>             | 1 |
| <a href="#">C Benchmark Prompts</a>                      | 2 |
| <a href="#">D Ablation of Resolution</a>                 | 2 |
| <a href="#">E Language Bias Detection</a>                | 2 |
| <a href="#">F Performance with Advanced Prompting</a>    | 3 |
| <a href="#">G Embedding Space of Benchmark Questions</a> | 3 |
| <a href="#">H Datasheet</a>                              | 5 |
| <a href="#">I. Image References</a>                      | 8 |

#### A. Quantifying Image Complexity

Measuring visual density or complexity remains a non-trivial challenge for standard metrics [15, 36, 42, 44]. To obtain complexity measurements of our dataset, we chose to quantify complexity through relative, pairwise comparisons across the full set of 150 images. We automate this process using Qwen3.5-27B (thinking) [58] to minimize human bias, sampling responses at temperature 1.0 ( $p = 0.95, k = 20, penalty = 1.0$ ). The model was provided with the following prompt:

Prompt for Image Complexity (Qwen3.5-27B)

```
<Image 1><Image 2> You are an expert in image analysis. Given two images, your task is to determine which image has a higher visual density and complexity. Do not attempt to identify the name of the painting. Respond with 'A' if the first image has higher complexity, 'B' if the second image has higher complexity.
```

The prompt explicitly instructs the model to ignore the identity of the artwork, encouraging a focus on visual composition rather than semantic recognition. While we observed that the model occasionally attempted identification within its reasoning traces, its final selections remained focused on density.

Ultimately, an image’s complexity score is defined as its empirical win-rate: the proportion of pairings in which the model selected it as the more complex image. Fig. 7

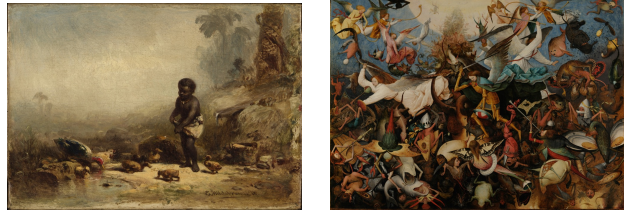

least complex (0.00 %)

most complex (99.3 %)

Figure 7. **Extreme ends of complexity distribution.** Shown are the least and most complex images according to our LLM-assisted measurements and their respective win-rate.

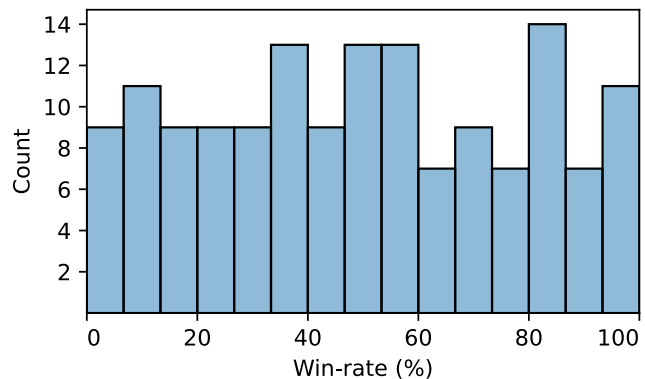

Figure 8. **Distribution of Image Complexity.** The distribution shows the win-rate over all 150 images in VisualOverload.

illustrates the images at the lowest and highest extremes of this calculated distribution (shown in Fig. 8).

#### B. Discussion of Domain Shift

VisualOverload consists of paintings, which will display a domain shift compared to natural images. We think of this shift as beneficial because we expect foundation models aiming for human-level perception to also be robust to stylistic abstractions.

The domain of historical paintings is a good testbed for this kind of robustness, as it offers distinct practical advantages: first, the paintings depict naturalistic scenes and objects before the time of photography. As such, they deviate from digital photos in various ways (style, color, etc.) while still maintaining the *core features* of objects, providing a good trade-off between realism and avoiding the biases of web-crawled data (center-focus, etc.). Second, we assume that this benchmark might be harder to solve than

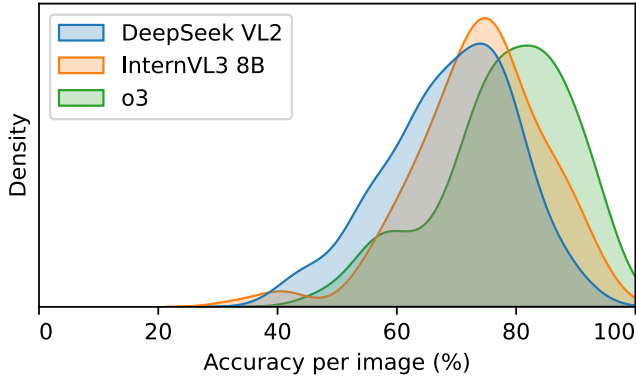

Figure 9. **Distribution of accuracy per image.** Three diverse models show distributions with clear peaks beyond average accuracy, thus proving that the challenge is caused by the content of the image and question, not the domain.

benchmarks consisting of natural images, by just crawling more data (or even generating), as the number of historical paintings is finite and not easily scalable. To improve performance, models will always, to a certain extent, have to be able to generalize. Finally, it is a domain that provides high-resolution images without depth-of-field blur (ensuring details are recognizable across the full scene) and provides a clean copyright status.

Finally, we investigate whether the domain shift may be correlated with the low performance of some models. As shown in the figure (Fig. 9), the per-image accuracy distributions for 3 distinct models lack the density near zero performance that would characterize a domain shift. Instead, they show a well-above random performance on most images, thus indicating that the performance is not tied to the domain but to the question and visual details. This is further backed by the measurements of logical consistency in Fig. 6, which show stark differences in performance for tasks differing in the required level of image understanding.

### C. Benchmark Prompts

We used the following prompts in our main evaluation, depending on the question type (multiple-choice, counting, or OCR):

#### Default Prompt for Multiple-Choice Questions

```
{Question} Options:
A. {Option A}
B. {Option B}
...
Answer with the option's letter from the given choices directly.
```

#### Default Prompt for OCR Questions

```
{Question} Answer directly.
```

#### Default Prompt for Counting Questions

```
{Question} Answer with a number directly.
```

### D. Ablation of Resolution

We distribute VisualOverload at a resolution that matches the pixels of 4K (with a few outliers). Additionally, we downsampled images to match the number of pixels of VGA ( $640 \times 480$  pixels), HD ( $1280 \times 720$  pixels), FHD ( $1920 \times 1080$  pixels), QHD ( $2560 \times 1440$  pixels), and measured task-level performances on various instances of InternVL3 models in comparison to our original resolution. The results are shown in Fig. 10.

Generally, performance improves with resolution, but at a minor rate. However, it is visible that improvements are differently correlated with tasks. Text (especially small one) is poorly compressible, and it is, thus, unsurprising to see a strong correlation between resolution and OCR performance. The opposite is modeled by scene recognition, which, for the most part, is solvable by global features that should be detectable even at extreme compression. This is backed by the lack of significant performance deviation throughout our tested resolutions. For the other tasks, we typically see an increase in performance with resolution, which seems to plateau after Full HD resolution.

This is likely not a shortcoming of our benchmark, but rather attributed to the model's architecture. By default, InternVL3 splits the input image into at most 12 patches (each  $448 \times 448$  pixels) plus a thumbnail [76]. Thus, the model only supports a resolution slightly above FHD without downsampling. While it is possible to increase the number of patches, this significantly increases the inference time and memory. For instance, even for InternVL3-8B, increasing the number of patches from 12 to 40, which should be sufficient to process VisualOverload without downsampling, requires  $8 \times 40$  GB GPUs, instead of just one, making such an experiment impossible for us. In theory, we, however, expect model performance to scale with resolution, assuming no downsampling. Consequently, we also expect higher performance using more patches (assuming a sufficient context window and proper training).

### E. Language Bias Detection

We use Gemini 2.5 Pro with the following prompt to detect language bias:

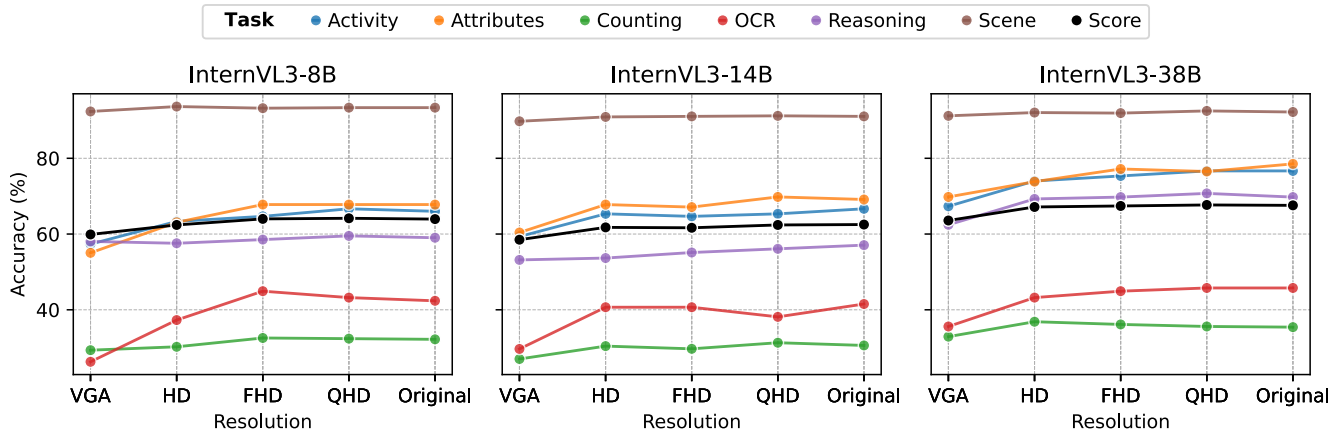

Figure 10. Resolution ablation.

#### Prompt for Language Bias Detection (Gemini 2.5 Pro)

Below you will find a CSV with an excerpt of questions from a visual question answering benchmark. The benchmark is supposed to be only solvable by looking at the image, however for the questions below, most models are able to guess the correct option (ground\_truth). Your task is to look at each questions, the options, and ground\_truth and to determine if the models were just lucky or there is some kind of shortcut or language bias. Provide an answer and rationale for each question\_id.

```
question_id, question, options,
ground_truth
{CSV}
```

Tab. 2 contains the quality control results discussed in Sec. 2.1.

## F. Performance with Advanced Prompting

Our evaluation in Sec. 3 utilizes simple prompts. In this section, we additionally ablate zero-shot chain-of-thought (CoT) [29, 62] on InternVL3 8B, the strongest 8B model on our benchmark, and an overall strong model. To this end, we modified the prompts as follows:

#### CoT Prompt for Multiple-Choice Questions

```
{Question} Options:
A. {Option A}
B. {Option B}
...
Think step by step. Answer with the option's letter from the
given choices wrapped in <answer></answer>.
```

#### CoT Prompt for OCR Questions

```
{Question} Think step by step. Answer with the extracted
text wrapped in <answer></answer>
```

#### CoT Prompt for Counting Questions

```
{Question} Think step by step. Answer with a number
wrapped in <answer></answer>
```

The results in Tab. 3 show that at least for this model, CoT decreased performance on average. However, it significantly improved performance on the hardest split and for OCR. Since CoT prompting is primarily effective in large-scale LLMs [62], we hypothesize that the tested LLM may have been too small to benefit from CoT.

## G. Embedding Space of Benchmark Questions

We show a UMAP [46] reduced embedding generated by Qwen3-embedding-4B [74] of all questions (without answers) colored by task in Fig. 11. A clear separation of tasks is visible, except for the reasoning task, which overlaps with multiple other tasks as intended. The OCR questions form the most disconnected cluster.

Table 2. **Blind benchmark results.** We benchmark three models on VisualOverload without the images to measure a potential language bias.

| Model                    | Params [B] | Activity (150) | Attributes (149) | Counting (559) | OCR (118) | Reasoning (356) | Scene (1388) | Easy (986) | Medium (1304) | Hard (430) | Total (2720) |
|--------------------------|------------|----------------|------------------|----------------|-----------|-----------------|--------------|------------|---------------|------------|--------------|
| <i>Random Chance</i>     | -          | 25.0           | 25.0             | 0.0            | 0.0       | 25.0            | 25.0         | 24.5       | 16.7          | 3.7        | 16.0         |
| <i>Consistent Chance</i> | -          | 25.0           | 25.0             | 0.0            | 0.0       | 42.5            | 50.0         | 47.2       | 26.2          | 4.7        | 27.2         |
| InternVL3 38B [76]       | 38         | 30.0           | 34.9             | 15.6           | 0.8       | 36.6            | 24.2         | 32.5       | 24.5          | 8.1        | 22.8         |
| Qwen2.5-VL 32B [5]       | 32         | 32.0           | 26.2             | 8.8            | 0.0       | 29.3            | 38.0         | 39.7       | 25.1          | 6.2        | 24.5         |
| LLaVA-OV 72B [33]        | 72         | 29.3           | 40.3             | 18.1           | 0.8       | 36.1            | 38.6         | 24.6       | 41.1          | 6.5        | 29.2         |

Table 3. **Comparison with CoT prompting.**

| Model              | Params [B] | Activity (150) | Attributes (149) | Counting (559) | OCR (118) | Reasoning (356) | Scene (1388) | Easy (986) | Medium (1304) | Hard (430) | Total (2720) |
|--------------------|------------|----------------|------------------|----------------|-----------|-----------------|--------------|------------|---------------|------------|--------------|
| InternVL3 38B [76] | 38         | 76.7           | 78.5             | 35.4           | 45.8      | 69.8            | 92.2         | 99.7       | 81.8          | 7.2        | 67.6         |
| + CoT              | 38         | 74.0           | 69.8             | 34.5           | 50.0      | 62.4            | 91.4         | 98.9       | 77.1          | 14.4       | 65.5         |

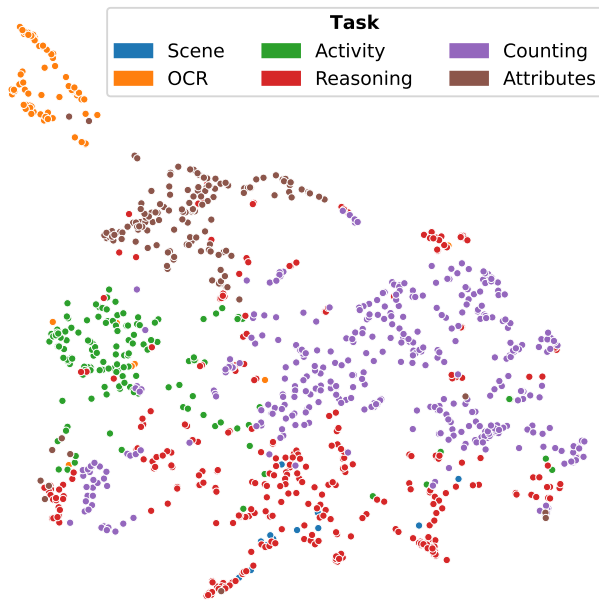

Figure 11. **Question embeddings.**

## H. Datasheet

In the following, we provide a datasheet [19]. We have anonymized some entries for the review process and will update these upon release.

### Motivation

#### For what purpose was the dataset created?

VisualOverload was created to test basic visual recognition skills of VLMs in densely populated scenes, as most prior VQA datasets often probe skills of superficial features.

#### Who created this dataset (e.g., which team, research group) and on behalf of which entity (e.g., company, institution, organization)?

The dataset was created by the authors of this paper on behalf of their institutions.

#### Who funded the creation of the dataset?

All authors were funded by their respective institutions.

### Composition

#### What do the instances that comprise the dataset represent (e.g., documents, photos, people, countries)?

The dataset consists of images associated with multiple questions.

#### How many instances are there in total (of each type, if appropriate)?

The dataset consists of 150 images and a total of 2720 questions.

#### Does the dataset contain all possible instances or is it a sample (not necessarily random) of instances from a larger set?

The images are a subset of public domain artworks hosted on <https://artsandculture.google.com> filtered to display visually complex and dense scenes.

#### What data does each instance consist of? “Raw” data (e.g., unprocessed text or images) or features?

Each sample is a collection of the following items:

- `question_id`: Unique identifier of each question.
- `image`: A PIL JPEG image. Most of our images were resized to match the total pixel count of 4k (3840x2160 px) in different aspect ratios.
- `question`: A question about the image.
- `question_type`: Type of question. Will be one of choice (response expected to be "A", "B", "C", or "D"), counting (freeform), or ocr (freeform). You can use this information to request a suitable output format.
- `options`: This is the list of options for `question_type=choice` and empty otherwise. Please treat the options as answer options A, B, C, D (4 options) or A, B (2 options).

- `difficulty`: Meta-data about the difficulty of the question. One of easy, medium, or hard.
- `category`: Meta-data about the question task. One of activity, attributes, counting, ocr, reasoning, or scene.
- `default_prompt`: You can use this prompt to stay compliant with our results. It is a simple combination of the question and answers, with some additional output format constraints. This should work well for most models.

Further, we provide a database linking each `image` to its respective `complexity_win_rate`, as defined in Appendix A.

#### Is there a label or target associated with each instance?

Each question is associated with a ground-truth. This ground-truth is hidden from the public to avoid test leakage.

#### Is any information missing from individual instances?

We obfuscate image file names and question IDs to reduce knowledge priors.

#### Are relationships between individual instances made explicit (e.g., users’ movie ratings, social network links)?

The samples in the dataset shall be treated independently.

#### Are there recommended data splits (e.g., training, development/validation, testing)?

All the samples in our dataset shall be exclusively treated as a test set. We do not provide development sets, as we consider all questions to be solvable with a basic set of skills that should be present in frontier VLMs.

#### Are there any errors, sources of noise, or redundancies in the dataset?

All questions and ground truths are manually annotated and, thus, may contain errors. To reduce the error rate, we double-checked all questions where multiple models provided wrong answers.

#### Is the dataset self-contained, or does it link to or otherwise rely on external resources (e.g., websites, tweets, other datasets)?

The dataset is self-contained.

#### Does the dataset contain data that might be considered confidential (e.g., data that is protected by legal privilege or by doctor-patient confidentiality, data that includes the content of individuals non-public communications)?

No.

#### Does the dataset contain data that, if viewed directly, might be offensive, insulting, threatening, or might otherwise cause anxiety?

The dataset contains samples that show religious beliefs, (partial) nudity, and/or injury and death.

#### Does the dataset relate to people?

The dataset contains artworks that may depict people.

**Does the dataset identify any subpopulations (e.g., by age, gender)?**

The dataset does not identify any subpopulations.

**Is it possible to identify individuals (i.e., one or more natural persons), either directly or indirectly (i.e., in combination with other data) from the dataset?**

Some of the individuals are of historical, biblical, or mythical origin and may be identified. No living individuals can be identified from the dataset.

**Does the dataset contain data that might be considered sensitive in any way (e.g., data that reveals racial or ethnic origins, sexual orientations, religious beliefs, political opinions or union memberships, or locations; financial or health data; biometric or genetic data; forms of government identification, such as social security numbers; criminal history)?**

No.

#### Collection Process

**How was the data associated with each instance acquired?**

Please see Sec. 2.

**What mechanisms or procedures were used to collect the data (e.g., hardware apparatus or sensor, manual human curation, software program, software API)?**

Please see Sec. 2.

**If the dataset is a sample from a larger set, what was the sampling strategy (e.g., deterministic, probabilistic with specific sampling probabilities)?**

n/a.

**Who was involved in the data collection process (e.g., students, crowdworkers, contractors) and how were they compensated (e.g., how much were crowdworkers paid)?**

The dataset was collected and annotated by the authors of this paper. No crowdworkers, students, or contractors, *etc.*, were involved.

**Over what timeframe was the data collected? Does this timeframe match the creation timeframe of the data associated with the instances (e.g., recent crawl of old news articles)?**

The images were collected between April and May 2025, and annotated and cleaned between May and August 2025.

**Were any ethical review processes conducted (e.g., by an institutional review board)?**

No.

**Does the dataset relate to people?**

The dataset contains artworks that may depict people.

**Did you collect the data from the individuals in question directly, or obtain it via third parties or other sources (e.g., websites)?**

n/a.

**Were the individuals in question notified about the data collection?**

All depicted individuals are no longer alive.

**Did the individuals in question consent to the collection and use of their data?**

n/a.

**If consent was obtained, were the consenting individuals provided with a mechanism to revoke their consent in the future or for certain uses?**

n/a.

**Has an analysis of the potential impact of the dataset and its use on data subjects (e.g., a data protection impact analysis) been conducted?**

n/a.

#### Preprocessing/cleaning/labeling

**Was any preprocessing/cleaning/labeling of the data done (e.g., discretization or bucketing, tokenization, part-of-speech tagging, SIFT feature extraction, removal of instances, processing of missing values)?**

Yes, see Sec. 2.

**Was the “raw” data saved in addition to the preprocessed/cleaned/labeled data (e.g., to support unanticipated future uses)?**

The raw data can be requested from the authors.

**Is the software used to preprocess/clean/label the instances available?**

The images were obtained using <https://github.com/lovasoa/dezoomify-rs>. All further processing scripts were developed by the authors and are not available publicly.

#### Uses

**Has the dataset been used for any tasks already?**

The dataset has been used to evaluate basic visual skills of frontier VLMs in Sec. 3.

**Is there a repository that links to any or all papers or systems that use the dataset?**

We will list relevant papers at <https://github.com/paulgavrikov/visualoverload>. We encourage authors to contact us to list their works.

**What (other) tasks could the dataset be used for?**

The dataset is primarily designed for visual question answering (VQA), but we encourage users to apply it to other tasks as desired.

**Is there anything about the composition of the dataset or the way it was collected and preprocessed/cleaned/labeled that might impact future uses?**

No.

**Are there tasks for which the dataset should not be used?**

This dataset is released exclusively for academic research and educational use. It must not be applied to purposes that could lead to harm, including surveillance, discrimination, exploitation, harassment, or the generation of misleading or offensive content. Users are expected to uphold the highest standards of research integrity and ethics, and to ensure that their work with this dataset aligns with responsible AI principles.

**Distribution**

**Will the dataset be distributed to third parties outside of the entity (e.g., company, institution, organization) on behalf of which the dataset was created?**

The dataset is publicly available.

**How will the dataset be distributed (e.g., tarball on website, API, GitHub)**

The dataset is distributed through HuggingFace datasets, which currently uses a PyArrow format.

**When will the dataset be distributed?**

The dataset is immediately distributed through: <https://huggingface.co/datasets/paulgavrikov/visualoverload>.

**Will the dataset be distributed under a copyright or other intellectual property (IP) license, and/or under applicable terms of use (ToU)?**

The dataset is distributed under the Creative Commons Attribution-ShareAlike 4.0 International license without any further terms of use.

**Have any third parties imposed IP-based or other restrictions on the data associated with the instances?**

No.

**Do any export controls or other regulatory restrictions apply to the dataset or to individual instances?**

No.

**Maintenance**

**Who will be supporting/hosting/maintaining the dataset?**

The authors will be supporting/hosting/maintaining the dataset.

**How can the owner/curator/manager of the dataset be contacted (e.g., email address)?**

The authors can be contacted via GitHub issues at: <https://github.com/paulgavrikov/visualoverload/issues>.

**Is there an erratum?**

No.

**Will the dataset be updated (e.g., to correct labeling errors, add new instances, delete instances)?**

The dataset will not be modified to ensure comparability of results. Corrected or derived datasets will be released independently.

**If the dataset relates to people, are there applicable limits on the retention of the data associated with the instances (e.g., were individuals in question told that their data would be retained for a fixed period of time and then deleted)?**

n/a.

**Will older versions of the dataset continue to be supported/hosted/maintained?**

The dataset will remain available as long as it continues to be hosted by the third-party platforms on which it is stored.

**If others want to extend/augment/build on/contribute to the dataset, is there a mechanism for them to do so?**

Users can extend/augment/build upon the dataset, but must publish their new work as a standalone derivative. We kindly request that users communicate any releases to the authors.

## I. Image References

Table 4. **List of artworks.** This table contains all artworks present in VisualOverload in random order. The metadata is taken from the references with minor postprocessing by us.

| <b>Creator</b>                                                   | <b>Title</b>                                                           | <b>Date</b>        | <b>URL</b>           |
|------------------------------------------------------------------|------------------------------------------------------------------------|--------------------|----------------------|
| Unknown                                                          | Wood of the Philosophers                                               | 1800/1830          | <a href="#">Link</a> |
| Pieter Aertsen                                                   | The Fat Kitchen. An Allegory                                           | 1565-1575          | <a href="#">Link</a> |
| Unknown                                                          | A handscroll painting of the porcelain production process (right half) | early 19th century | <a href="#">Link</a> |
| Avercamp, Hendrick                                               | Enjoying the Ice                                                       | ca. 1615-1620      | <a href="#">Link</a> |
| Charles M. Russell                                               | The Medicine Man                                                       | 1908               | <a href="#">Link</a> |
| Pieter van der Heyden after Pieter Bruegel the Elder             | The Big Fish Eat the Little Fish                                       | published 1557     | <a href="#">Link</a> |
| Charles Fairfax Murray                                           | Allegory of Good Government, after Ambrogio Lorenzetti                 | 1873               | <a href="#">Link</a> |
| Philip Galle after Pieter Bruegel the Elder                      | Prudence                                                               | published 1559     | <a href="#">Link</a> |
| Pieter Bruegel the Elder, Frans Hogenberg                        | The Kermis at Hoboken                                                  | ca. 1559           | <a href="#">Link</a> |
| Joan Antigó, Honorat Borrassà i Francesc Vergós                  | Altarpiece of Saint Miquel de Castelló d'Empúries (detail)             | 1448               | <a href="#">Link</a> |
| Greek artist from the end of the 18th century                    | St. George                                                             | 1798/1798          | <a href="#">Link</a> |
| Pieter Bruegel the Elder, Pieter van der Heyden, Hieronymus Cock | Anger (Ira) from The Seven Deadly Sins                                 | 1558               | <a href="#">Link</a> |
| Dirck Franchoisz Hals, Dirck van Delen                           | Festive Company in a Renaissance Room                                  | 1628               | <a href="#">Link</a> |
| Philips Galle, Pieter Bruegel the Elder, Hieronymus Cock         | Charity (Charitas) from The Virtues                                    | 1559               | <a href="#">Link</a> |
| Unknown                                                          | A Sunday on La Grande Jatte                                            | 1884-1886          | <a href="#">Link</a> |
| Charles William Sharpe                                           | The Death of Nelson at the Battle of Trafalgar                         | 1806/1876          | <a href="#">Link</a> |
| Ast, Balthasar van der                                           | Still Life with Fruit and Flowers                                      | 1620-1621          | <a href="#">Link</a> |
| School of Canaletto                                              | St. Marks, Venice                                                      | unknown            | <a href="#">Link</a> |
| Pieter Bruegel the Elder                                         | The Sermon of Saint John the Baptist                                   | 1566               | <a href="#">Link</a> |
| Pieter Aertsen                                                   | Market Scene                                                           | 1569               | <a href="#">Link</a> |
| Thomas Matthews Rooke                                            | Washing Sheds at Chartres                                              | 1885               | <a href="#">Link</a> |
| Severin Roesen                                                   | Still Life of Flowers and Fruit with a River Landscape in the Distance | 1867               | <a href="#">Link</a> |
| Pere Mates                                                       | Final Judgment. Altarpiece of Santa Maria de Segueró (Garrotxa)        | 1500/1550          | <a href="#">Link</a> |
| Steen, Jan Havicksz                                              | Villagers Merrymaking Outside an Inn                                   | 1652               | <a href="#">Link</a> |

|                                                                  |                                                                        |                |                      |
|------------------------------------------------------------------|------------------------------------------------------------------------|----------------|----------------------|
| Hieronymus Bosch                                                 | Ecce Homo                                                              | 1500           | <a href="#">Link</a> |
| Jan Steen                                                        | Beware of Luxury (“In Weelde Siet Toe”)                                | 1663           | <a href="#">Link</a> |
| Unknown                                                          | Christ in the House of Martha and Mary                                 | 1553           | <a href="#">Link</a> |
| Ostade, Adriaen van                                              | Peasants in an Interior                                                | 1661           | <a href="#">Link</a> |
| Pieter Bruegel the Elder                                         | Desidia (Sloth)                                                        | 1557           | <a href="#">Link</a> |
| Avercamp, Hendrick                                               | Enjoying the Ice near a Town                                           | ca. 1620       | <a href="#">Link</a> |
| Rijn, Rembrandt van                                              | The Night Watch                                                        | 1642           | <a href="#">Link</a> |
| Ditlev Blunck                                                    | Danish artists at the Osteria La Gensola in Rome                       | 1837           | <a href="#">Link</a> |
| Konstantin Makovsky                                              | A Boyar Wedding Feast                                                  | 1883           | <a href="#">Link</a> |
| Unknown                                                          | The trial of the Neptune’s seamen                                      | 1807           | <a href="#">Link</a> |
| Albrecht Altdorfer                                               | Christ taking Leave of his Mother                                      | probably 1520  | <a href="#">Link</a> |
| Baines, Thomas                                                   | Kaffirs and Rebel Hottentotts Attacking a Wagon Train                  | 1851/1852      | <a href="#">Link</a> |
| Unknown                                                          | Bucentaur’s return to the pier by the Palazzo Ducale                   | 1728/1729      | <a href="#">Link</a> |
| Neer, Aert van der                                               | Winter Landscape near a Town with Kolf Players and Horse-Drawn Sleighs | ca. 1650-1655  | <a href="#">Link</a> |
| Philip Galle after Pieter Bruegel the Elder                      | Faith                                                                  | published 1559 | <a href="#">Link</a> |
| Francesco Hayez                                                  | Pope Urban II Preaching the First Crusade in the Square of Clermont    | 1835/1835      | <a href="#">Link</a> |
| Pieter Bruegel the Elder                                         | The Fall of the Rebel Angels                                           | 1562           | <a href="#">Link</a> |
| Atelier de Paris                                                 | Psyché rapporte la laine des brebis                                    | 1650           | <a href="#">Link</a> |
| Hals, Dirck                                                      | The Fête champêtre                                                     | 1627           | <a href="#">Link</a> |
| Baines, Henry                                                    | Fisherfleet Looking East                                               | 1823/1894      | <a href="#">Link</a> |
| Jan Cornelisz. Vermeyen                                          | The Spanish Brothel                                                    | 1545           | <a href="#">Link</a> |
| Marià Vayreda i Vila                                             | Gambeto dance in Riudaura                                              | 1890           | <a href="#">Link</a> |
| Paolo De Matteis                                                 | St. Nicolas of Bari Felling a Tree Inhabited by Demons                 | 1727/1727      | <a href="#">Link</a> |
| Philip Galle, Pieter Bruegel                                     | The Resurrection of Christ                                             | ca. 1562       | <a href="#">Link</a> |
| Pieter Aertsen                                                   | Market Scene                                                           | 1550           | <a href="#">Link</a> |
| Pieter Aertsen                                                   | Christ with Mary and Martha                                            | 1552           | <a href="#">Link</a> |
| Philip Galle after Pieter Bruegel the Elder                      | The Parable of the Wise and Foolish Virgins                            | ca. 1560/1563  | <a href="#">Link</a> |
| Unknown                                                          | Dragon Boats at Aberdeen Hong Kong showing Careening Island            | 1923           | <a href="#">Link</a> |
| Pieter Bruegel the Elder, Pieter van der Heyden, Hieronymus Cock | Avarice (Avaritia), from the series The Seven Deadly Sins              | 1558           | <a href="#">Link</a> |
| Hendrick Avercamp                                                | A Scene on the Ice                                                     | ca. 1625       | <a href="#">Link</a> |
| Attributed to Jan van Belcamp                                    | The Great Picture                                                      | 1646           | <a href="#">Link</a> |

|                                                                  |                                                                                                                 |                |                      |
|------------------------------------------------------------------|-----------------------------------------------------------------------------------------------------------------|----------------|----------------------|
| Aleksander Ivanov                                                | The Apparition of Christ to the People (The Apparition of the Messiah)                                          | 1837-1857      | <a href="#">Link</a> |
| Hendrick Avercamp                                                | Frozen River with Skaters                                                                                       | 1620s          | <a href="#">Link</a> |
| Jan Rost                                                         | The Pharaoh Welcomes Joseph                                                                                     | 1553           | <a href="#">Link</a> |
| Aertsen, Pieter                                                  | Wing of an Altarpiece with Adoration of the Magi, on the reverse is Presentation in the Temple                  | 1560-1565      | <a href="#">Link</a> |
| Van Aachen, Hans                                                 | The Rape of Proserpine                                                                                          | 1589           | <a href="#">Link</a> |
| Avercamp, Hendrick                                               | Winter Landscape with Ice Skaters                                                                               | ca. 1608       | <a href="#">Link</a> |
| Estevão Silva                                                    | Untitled                                                                                                        | 1887/1887      | <a href="#">Link</a> |
| Pieter Bruegel, J. Liefrinck, H. Hondius                         | The fat kitchen                                                                                                 | 1563           | <a href="#">Link</a> |
| Unknown                                                          | Moses descends from Mount Siniaï with the Ten Commandments                                                      | 1662           | <a href="#">Link</a> |
| Unknown                                                          | British forces receiving Commissioner Keying at Canton's British Factories for conference with Sir J. F. Davies | 1847           | <a href="#">Link</a> |
| Unknown                                                          | Le peuple rend les honneurs à Psyché                                                                            | 1650           | <a href="#">Link</a> |
| Pieter Bruegel the Elder                                         | Peasant Wedding                                                                                                 | 1566-1569      | <a href="#">Link</a> |
| Jan Miense Molenaer                                              | Self-Portrait with Family Members                                                                               | 1630/1640      | <a href="#">Link</a> |
| Philip Galle after Pieter Bruegel the Elder                      | Temperance                                                                                                      | published 1559 | <a href="#">Link</a> |
| Anonymous                                                        | Christ as the Good Shepherd                                                                                     | 1505           | <a href="#">Link</a> |
| Dirck Jacobsz Vellert                                            | The Flood                                                                                                       | 1544           | <a href="#">Link</a> |
| Cornelis Cornelisz van Haarlem                                   | The Golden Age (Bacchanal) or the Garden of Love                                                                | 1614           | <a href="#">Link</a> |
| Aertsen, Pieter                                                  | The Adoration of the Magi                                                                                       | ca. 1560       | <a href="#">Link</a> |
| William Duffield                                                 | Still Life                                                                                                      | 1859           | <a href="#">Link</a> |
| Balthasar van der Ast                                            | Still Life of Flowers, Fruit, Shells, and Insects                                                               | About 1629     | <a href="#">Link</a> |
| Albrecht Dürer                                                   | Feast of Rose Garlands                                                                                          | 1506           | <a href="#">Link</a> |
| Jan Steen                                                        | The Dancing Couple                                                                                              | 1663           | <a href="#">Link</a> |
| Jan Steen                                                        | The Worship of the Golden Calf                                                                                  | ca. 1672-1675  | <a href="#">Link</a> |
| Carl Bloch                                                       | In a Roman Osteria                                                                                              | 1866           | <a href="#">Link</a> |
| Avercamp, Hendrick                                               | Ice-Skating in a Village                                                                                        | ca. 1610       | <a href="#">Link</a> |
| After Pieter Bruegel the Elder                                   | The Festival of Fools                                                                                           | after 1570     | <a href="#">Link</a> |
| Pieter van der Heyden after Pieter Bruegel the Elder             | The Witch of Malleghem                                                                                          | published 1559 | <a href="#">Link</a> |
| Pieter van der Heyden, Pieter Bruegel the Elder, Hieronymus Cock | Patience (Patientia)                                                                                            | 1557           | <a href="#">Link</a> |
| Francisco de Goya                                                | El Entierro de la Sardina                                                                                       | 1808/1812      | <a href="#">Link</a> |

|                                                                  |                                                                |                |                      |
|------------------------------------------------------------------|----------------------------------------------------------------|----------------|----------------------|
| Master of Okolično                                               | Holy Kinship                                                   | 1510           | <a href="#">Link</a> |
| Maarten van Heemskerck                                           | The Gods of the Olympus                                        | 1556           | <a href="#">Link</a> |
| Gerrit van Honthorst                                             | Apollo and Diana                                               | 1628           | <a href="#">Link</a> |
| Pieter Bruegel the Elder                                         | Children's Games                                               | 1560           | <a href="#">Link</a> |
| Hendrick Avercamp                                                | Skating Scene                                                  | 1620s          | <a href="#">Link</a> |
| Pieter Bruegel the Elder                                         | The Adoration of the Magi                                      | undated        | <a href="#">Link</a> |
| Bol, Ferdinand                                                   | Consul Titus Manlius Torquatus Orders the Beheading of his Son | 1661-1663      | <a href="#">Link</a> |
| Balthasar van der Ast                                            | Still Life with Basket of Fruit                                | 1622           | <a href="#">Link</a> |
| Pieter Bruegel the Elder, Philips Galle, Hieronymus Cock         | The Alchemist                                                  | after 1558     | <a href="#">Link</a> |
| Claesz., Pieter                                                  | Still Life with a Turkey Pie                                   | 1627           | <a href="#">Link</a> |
| Pieter Bruegel the Elder                                         | The Dirty Bride or the Marriage of Mopsus and Nisa             | 1570           | <a href="#">Link</a> |
| Western artist painted from the deck of HMS Vulcan               | British and French fleets in Victoria Harbour                  | 1860           | <a href="#">Link</a> |
| Pieter Bruegel the Elder                                         | Hunters in the Snow (Winter)                                   | 1565           | <a href="#">Link</a> |
| Philips Galle, Pieter Bruegel the Elder, Hieronymus Cock         | Justice (Justicia) from The Virtues                            | ca. 1559–60    | <a href="#">Link</a> |
| Giulio Romano                                                    | Chamber of the Giants - Ceiling                                | 1532-1534      | <a href="#">Link</a> |
| Pieter Bruegel the Elder, Pieter van der Heyden, Hieronymus Cock | The Descent of Christ Into Limbo                               | ca. 1561       | <a href="#">Link</a> |
| Hendrick Avercamp                                                | Winter Landscape                                               | 1600/1620      | <a href="#">Link</a> |
| Arcadi Mas i Fondevila                                           | The Corpus Christi procession                                  | 1887           | <a href="#">Link</a> |
| Unknown                                                          | Winter Scene on a Frozen Canal                                 | 1620           | <a href="#">Link</a> |
| Caroline Le Souef                                                | Home Life of the Victorian Aborigines                          | 1895-1895      | <a href="#">Link</a> |
| Andrej Janez Herrlein                                            | Ljubljana Šempeter                                             | 1798           | <a href="#">Link</a> |
| Edward Roper                                                     | Gold Diggings, Ararat                                          | 1855-1860      | <a href="#">Link</a> |
| Pieter Bruegel the Elder                                         | Massacre of the Innocents                                      | 1565-1567      | <a href="#">Link</a> |
| Lucas van Leyden                                                 | Christ presented to the people                                 | 1510           | <a href="#">Link</a> |
| Hans Bol                                                         | Goose Snatching                                                | 1560/1580      | <a href="#">Link</a> |
| Edouard Hildebrand                                               | Menino com patos                                               | 1800/1800      | <a href="#">Link</a> |
| Pieter Bruegel the Elder                                         | The Census at Bethlehem                                        | 1566           | <a href="#">Link</a> |
| Frans Huys                                                       | Ice Skating before the Gate of Saint George in Antwerp         | 1558           | <a href="#">Link</a> |
| Pieter Aertsen                                                   | A Meat Stall with the Holy Family Giving Alms                  | 1551           | <a href="#">Link</a> |
| Philip Galle after Pieter Bruegel the Elder                      | Fortitude                                                      | published 1559 | <a href="#">Link</a> |
| Lucas Cranach the Elder                                          | The Crucifixion                                                | 1506-1520      | <a href="#">Link</a> |
| Bol, Ferdinand                                                   | Aeneas Crowning Cloanthus                                      | ca. 1661-1663  | <a href="#">Link</a> |

|                                                                  |                                                                                |                             |                      |
|------------------------------------------------------------------|--------------------------------------------------------------------------------|-----------------------------|----------------------|
| Pelegrí Clavé i Roqué                                            | Jacob receives the bloody tunic of his son Joseph                              | 1842                        | <a href="#">Link</a> |
| Aertsen, Pieter                                                  | The Egg Dance                                                                  | 1552                        | <a href="#">Link</a> |
| Unknown                                                          | The Village Wedding                                                            | 1653                        | <a href="#">Link</a> |
| Joos van Craesbeeck                                              | The Temptation of Saint Anthony                                                | 1650                        | <a href="#">Link</a> |
| Pieter Bruegel the Elder                                         | Winter Landscape with Skaters and Birds Trap                                   | 1565                        | <a href="#">Link</a> |
| Caroline Le Souef                                                | Native Fight on the Lower Goulburn River in 1842                               | 1895-1895                   | <a href="#">Link</a> |
| Joachim Wtewael                                                  | The Annunciation to the Shepherds                                              | 1606                        | <a href="#">Link</a> |
| Joachim Beuckelaer                                               | Woman Selling Vegetables                                                       | second half of 16th century | <a href="#">Link</a> |
| Unknown                                                          | Dragon boat racing at Spring Festival                                          | 1860                        | <a href="#">Link</a> |
| Karl Brullov                                                     | The Last Day of Pompeii                                                        | 1830/1833                   | <a href="#">Link</a> |
| Caroline Le Souef                                                | Corroboree on the Goulburn River                                               | 1895-1895                   | <a href="#">Link</a> |
| Pieter Bruegel the Elder, Hieronymus Cock, Philips Galle         | Hope (Spes) from The Virtues                                                   | ca. 1559–60                 | <a href="#">Link</a> |
| Steen, Jan Havicksz.                                             | The Feast of St Nicholas                                                       | 1665-1668                   | <a href="#">Link</a> |
| Hans Memling                                                     | Virgin and Child with Saints Catherine of Alexandria and Barbara               | early 1480s                 | <a href="#">Link</a> |
| Gerard Dou                                                       | The Quack                                                                      | 1652                        | <a href="#">Link</a> |
| Baines, Thomas                                                   | Forces under General Cathcart crossing the Orange river to attack Moshesh 1852 | 1854                        | <a href="#">Link</a> |
| Namcheong                                                        | Whampoa's earliest mud dock, Canton                                            | ca. 1850s                   | <a href="#">Link</a> |
| Jan Fyt                                                          | Still life with parrot                                                         | ca. 1645                    | <a href="#">Link</a> |
| Oldmeadow, William H.                                            | Reffley Spring                                                                 | 1818                        | <a href="#">Link</a> |
| Bartholomeus van Bassen, Esaias van den Velde                    | Renaissance Interior with Banqueters                                           | 1618/1622                   | <a href="#">Link</a> |
| Gift of Mr. Antony J. Hardy                                      | Bamboo Town and Anchorage at Whampoa Island                                    | 1860                        | <a href="#">Link</a> |
| Unknown                                                          | A handscroll painting of the porcelain production process (left half)          | early 19th century          | <a href="#">Link</a> |
| Pieter Brueghel, Pieter van der Heyden, Hieronymus Cock          | Luxuria, uno de los siete vicios                                               | 1558                        | <a href="#">Link</a> |
| Pieter Brueghel                                                  | La soberbia Serie de los siete pecados capitales                               | 1558                        | <a href="#">Link</a> |
| Pieter Bruegel the Elder                                         | Landscape with the Fall of Icarus                                              | undated                     | <a href="#">Link</a> |
| Pieter Bruegel the Elder, Pieter van der Heyden, Hieronymus Cock | The Last Judgment                                                              | 1558                        | <a href="#">Link</a> |
| Hans Memling                                                     | The Annunciation                                                               | 1480–89                     | <a href="#">Link</a> |
| James Taylor                                                     | Panorama du Port Jackson et de la ville de Sidney                              | 1820/1825                   | <a href="#">Link</a> |
| Avercamp, Hendrick                                               | Frolicking on a Frozen Canal in a Town                                         | ca. 1615-1620               | <a href="#">Link</a> |

|                                |                                                  |       |                      |
|--------------------------------|--------------------------------------------------|-------|----------------------|
| After Pieter Bruegel the Elder | Gluttony (Gula) from The Seven Deadly Sins       | 1558  | <a href="#">Link</a> |
| Felip Massó i Falp             | The Procession of St. Bartolomew                 | 1884  | <a href="#">Link</a> |
| Pieter Bruegel the Elder       | The Dutch Proverbs                               | 1559  | <a href="#">Link</a> |
| Maertan Van Heemskerck         | Concert of Apollo and the Muses on Mount Helicon | 1565  | <a href="#">Link</a> |
| David Teniers the Younger      | The Surgeon                                      | 1670s | <a href="#">Link</a> |
